# Supplementary material for: Downregulation of UBA1 expression in myelodysplastic neoplasm
Source: PubMed Central journal article supplement — Leukemia. 2024 Aug 23;38(10):2284–8. doi: 10.1038/s41375-024-02364-x (PMC11436355; doi:10.1038/s41375-024-02364-x), 2024-08-23

## **SUPPLEMENTAL MATERIALS AND METHODS**

### **Colony formation assay**

Isolation of human CD34<sup>+</sup> cells from healthy donors (n=6, AllCells, Alameda, CA) was performed using MicroBead Kit (Miltenyi, Bergisch Gladbach, Germany) following the manufacturer's instructions. For colony formation assays of human cells, BM CD34<sup>+</sup> cells were seeded at  $0.2-1 \times 10^4$  cells/mL in 12-well culture dishes with Methocult GF H4434 (STEMCELL Technologies, Vancouver, Canada). For mouse cells, mouse BM LSK cells from control-treated (n=8) and TAK243-treated (n=9) mice were added to Methocult 3434 medium (STEMCELL Technologies) and plated at 300 cells/plate in 12-well culture dishes. Colonies were evaluated after 2 weeks of culture.

### **Mice and treatment**

BL6 mice were maintained in pathogen-free conditions and their care followed animal use protocols approved by The University of Texas MD Anderson Cancer Center Institutional Care and Use Committee and US Department of Health and Human Services guidelines. Mice received TAK243 (10 mg/kg) via intraperitoneal injection twice weekly for 2 weeks. Complete blood count analysis in control-treated (n=4) and TAK243-treated (n=4) mice was performed using a HORIBA ABX Pentra analyzer (HORIBA Instruments Incorporated, Irvine, CA). Cell suspensions of BM or spleen of control-treated (n=8) and TAK243-treated (n=9) mice were incubated with antibodies and analyzed using a Gollios flow cytometer (Beckman Coulter, Indianapolis, IN). Data were analyzed using the Kaluza flow cytometry analysis software (Beckman Coulter). Mouse BM LSK cells were added to Methocult 3434 medium (STEMCELL Technologies) and plated at 300 cells/plate in 12-well culture dishes for colony formation assays.

### **Competitive transplantation assay**

CD45.2 BM LSK cells from BL6 control-treated (n=4) and TAK243-treated (n=7) mice were isolated and  $1 \times 10^6$  cells were mixed with an equal number of CD45.1 competing BM cells from wild-type mice. Cell mixtures were transplanted into lethally irradiated CD45.1 recipient mice at 8 weeks of age. BM chimerism after transplantation was assessed by FACS. Cells were stained with PE-CD45.1 and FITC-CD45.2 antibodies (BD Biosciences, San Jose, CA).

## SUPPLEMENTAL DATA

### Supplemental Figure Legend

**Supplemental Figure 1. UBA1 in human MDS. (A)** Western blot of UBA1a and UBA1b protein expression levels as well as quantitation (relative ratios of UBA1/  $\beta$ -Actin) in whole bone marrow mononuclear cells from HD and MDS showing UBA1 RNA downregulation (MDS #1 and #2) or normal UBA1 RNA expression (MDS #3). **(B-C)** Clinical characteristics groups that are significantly different between patients with and without downregulated UBA1 RNA in the MDS-EB **(B)** and MDS-LB **(C)**. P-values were calculated using one tail t-test. (NS, not significant; CG, cytogenetic characteristics; WBC, white blood cell count; ANC, absolute neutrophil count.) **(D)** A trend of increased IFN- $\beta$  cytokine levels in bone marrow plasma of HD (n=5) and patients with MDS-LB with normal UBA1 (n=6) and UBA1 downregulation (n=9). Bars represent the means + S.E.M. P-values were calculated using one tail t-test.

### Supplemental Figure 2. Study mechanisms underlying the co-occurrence of UBA1

**downregulation and SF3B1 mutations. (A)** Junction counts analysis detected significant alternative pre-mRNA splicing in bone marrow CD34+ cells that specifically occurred in patients with myelodysplastic syndrome with low blasts (MDS-LB) and *SF3B1* mutations but not in MDS-LB patients who had wild-type *SF3B1*. **(B)** Increased FOXO3 and FOXO4 genes in HD (n=12) MDS-LB with UBA1 downregulation and *SF3B1* mutations (n=6) and other MDS-LB (n=24). Bars represent the means + S.E.M. P-values were calculated using one tail t-test. **(C)** Increased

PB IFN- $\beta$  detected by ELISA in HD (n=5) MDS-LB with UBA1 downregulation and SF3B1 mutations (n=5) and other MDS-LB (n=11). Bars represent the means + S.E.M. P-values were calculated using one tail t-test. A3SS: alternative 3' splice site; A5SS: alternative 5' splice site; MXE: mutually exclusive exons; RI: retained introns, and SE: skipped exons.

**Supplemental Figure 3. TAK243 treatment in human BM HSPC and mice. (A)** Western blot of Poly-ubiquitin levels in K562 cells with TAK243 or vehicle control. **(B)** Western blot of ubiquitin and Uba1 levels in spleen cells of BL6 mice treated with TAK243 or vehicle control. **(C-G)** Impact of TAK243 treatment in PB lymphocyte count **(C)**, monocyte count **(D)**, neutrophil count **(E)** (n=4 for control and TAK243 treated mice respectively), frequency of BM Gr1+/CD11b+ myeloid cells **(F)**, and frequency of B220+ lymphocytes **(G)** (n=8 for control- and TAK243-treated mice respectively). **(H)** Reads per kilobase of transcript per million mapped reads based on RNA-seq and statistical values of complement genes C1s2 and C6 in bone marrow LSK cells of TAK243- or control-treated mice. **(I)** Flow cytometry detected annexin V+/apoptotic cells in cultured human BM CD34+ cells (left, n=6 for both TAK243 and control-treated) and in BM cells from treated mice (right, n=4 for control and n=3 for TAK243 treated mice). Bars represent the means + S.E.M. P-values were calculated using one tail t-test.

**Supplemental Table 1. Patient Cohort and Clinical Characteristics**

| <b>Variable</b>                                                   | <b>MDS-EB, n=29</b> | <b>MDS-LB, n=22</b> | <b>CMML, n=21</b> |
|-------------------------------------------------------------------|---------------------|---------------------|-------------------|
| Median age (range), years                                         | 70 (55-87)          | 71 (42-80)          | 74 (47-87)        |
| Median hemoglobin (range), g/dL                                   | 9 (6.9-14.6)        | 9.5 (8.2-14.3)      | 11.2 (8.4-14.6)   |
| Median white blood cell count (range), $\times 10^9/L$            | 2.5 (0.6-9.8)       | 4.1 (2.8-11.5)      | 9.4 (3.3-59.4)    |
| Median peripheral blood monocyte count (range), $\times 10^9/L$   | 0.3 (0-0.71)        | 0.4 (0.04-1.8)      | 2.3 (0.8-12.6)    |
| Median peripheral blood neutrophil count (range), $\times 10^9/L$ | 0.9 (0.2-2.7)       | 2.3 (0.6-9.4)       | 6 (0.8-40.4)      |
| Median peripheral blood platelet count (range), $\times 10^9/L$   | 89 (22-250)         | 133 (12-331)        | 82 (16-201)       |
| Median bone marrow blast percentage (range)                       | 9 (5-18)            | 2 (0-4)             | 5 (1-17)          |
| Cytogenetic characteristics                                       |                     |                     |                   |
| Diploid, no. (%)                                                  | 15 (52)             | 14 (64)             | 13 (62)           |
| Intermediate, no. (%)                                             | 4 (14)              | 6 (27)              | 5 (24)            |
| Complex, no. (%)                                                  | 10 (34)             | 2 (9)               | 3 (14)            |

MDS-EB, myelodysplastic syndrome with excess blasts; MDS-LB, myelodysplastic syndrome with low blasts; CMML, chronic myelomonocytic leukemia

**Supplemental Table 2. Genes upregulated in BM LSK of mice treated by TAK243 compared to mice treated by**

| Gene          | log2FoldCI | pvalue   | padj     |
|---------------|------------|----------|----------|
| Igkv4-80      | 7.922424   | 4.58E-07 | 0.000271 |
| Vmn1r217      | 7.829917   | 6.83E-05 | 0.010051 |
| Gm3616        | 7.70426    | 0.000104 | 0.013302 |
| Gm3683        | 7.70426    | 0.000104 | 0.013302 |
| Syt16         | 7.625788   | 2.77E-05 | 0.005618 |
| Gm30551       | 7.580929   | 0.000289 | 0.025531 |
| Gm49306       | 7.470928   | 0.00034  | 0.028214 |
| Trim40        | 7.438337   | 0.000437 | 0.031943 |
| Ighv14-3      | 7.407871   | 3.72E-09 | 4.40E-06 |
| Gm11756       | 7.257085   | 0.00053  | 0.035231 |
| AC140365.1    | 7.250976   | 0.000298 | 0.02598  |
| Gm5405        | 7.247101   | 0.000602 | 0.037118 |
| Myh3          | 7.24618    | 1.58E-05 | 0.003715 |
| 6430710C18Rik | 7.23201    | 0.000463 | 0.033191 |
| Gm42827       | 7.221349   | 0.000687 | 0.039863 |
| Gm50332       | 7.184552   | 0.000399 | 0.030366 |
| Igkv4-57-1    | 7.146376   | 0.000581 | 0.036718 |
| Gm18577       | 7.114389   | 0.000112 | 0.013891 |
| Mgat5b        | 7.109416   | 8.27E-05 | 0.011422 |
| Tmco5         | 7.101721   | 0.000593 | 0.036915 |
| Ccdc85a       | 7.087252   | 0.00035  | 0.028447 |
| Gm37779       | 7.082411   | 0.00095  | 0.048833 |
| Tmprss11b     | 7.045858   | 0.000135 | 0.015803 |
| Cdcp3         | 7.034939   | 0.000176 | 0.018359 |
| Rp111         | 7.028387   | 0.000359 | 0.028727 |
| Gm10354       | 7.025601   | 0.000203 | 0.02014  |
| Adgrb3        | 7.017483   | 0.000165 | 0.017706 |
| Vmn1r49       | 6.970209   | 0.000364 | 0.028943 |
| Cyp3a11       | 6.961869   | 0.000596 | 0.036915 |
| Gm21065       | 6.925577   | 0.000729 | 0.041867 |
| Gm20853       | 6.925577   | 0.000729 | 0.041867 |
| Trpv1         | 6.896086   | 0.0002   | 0.019996 |
| Gm12724       | 6.893327   | 0.000904 | 0.0474   |
| Gm21388       | 6.884426   | 0.000278 | 0.025166 |
| Gm10832       | 6.855578   | 0.000166 | 0.017706 |
| Gm6176        | 6.855232   | 0.00033  | 0.027925 |
| Gm21035       | 6.853421   | 0.00054  | 0.03535  |
| Fcrl6         | 6.84288    | 0.000618 | 0.037624 |
| Gm21034       | 6.815486   | 0.000621 | 0.037701 |
| Ighv1-5       | 6.774658   | 5.25E-07 | 0.000293 |
| Gm3508        | 6.768522   | 0.000174 | 0.018208 |
| 9830107B12Rik | 6.757542   | 2.53E-05 | 0.005279 |
| Cyp4a30b      | 6.716421   | 0.000324 | 0.027602 |
| C6            | 6.686207   | 0.000922 | 0.047812 |
| Vmn1r73       | 6.669129   | 0.000551 | 0.035852 |

|               |          |          |          |
|---------------|----------|----------|----------|
| Gm35439       | 6.618838 | 8.82E-05 | 0.011918 |
| Gm3047        | 6.578817 | 0.000192 | 0.019517 |
| Gm2366        | 6.578323 | 0.000479 | 0.033638 |
| Gm39043       | 6.565741 | 0.000498 | 0.033954 |
| Gm26630       | 6.551469 | 0.000489 | 0.033851 |
| Gm26650       | 6.471591 | 0.000162 | 0.017663 |
| Gm4454        | 6.465396 | 0.000592 | 0.036915 |
| Col6a5        | 6.455961 | 0.00056  | 0.035943 |
| Gm7945        | 6.445946 | 0.000763 | 0.043095 |
| Gm29187       | 6.445504 | 4.58E-05 | 0.007879 |
| Hnr           | 6.439507 | 4.17E-05 | 0.007364 |
| Gm8159        | 6.438589 | 0.000341 | 0.028214 |
| Gm31577       | 6.393192 | 0.000217 | 0.021136 |
| Ehf           | 6.381118 | 0.000749 | 0.042662 |
| Gm7556        | 6.378083 | 0.000343 | 0.028214 |
| Trim31        | 6.360297 | 0.000668 | 0.039576 |
| D130079A08Rik | 6.339459 | 0.000854 | 0.046184 |
| Gm44992       | 6.339113 | 0.000298 | 0.02598  |
| Gm49593       | 6.323357 | 0.000537 | 0.035231 |
| Gm13346       | 6.233384 | 0.000124 | 0.014702 |
| Gm6902        | 6.22643  | 0.000485 | 0.033851 |
| Emx2os        | 6.19961  | 0.000186 | 0.01924  |
| Gm44930       | 6.192322 | 0.000365 | 0.028948 |
| Gm2117        | 6.183155 | 0.000947 | 0.048732 |
| Pigr          | 6.140326 | 0.000534 | 0.035231 |
| Ngef          | 6.124128 | 0.000654 | 0.039241 |
| 1700007P06Rik | 6.102084 | 0.000421 | 0.031365 |
| Hgd           | 6.022706 | 0.000595 | 0.036915 |
| Gm6729        | 5.994717 | 2.61E-05 | 0.005401 |
| Adgrb1        | 5.912586 | 0.000141 | 0.016243 |
| Gm2244        | 5.901678 | 0.000582 | 0.036718 |
| 1700013F07Rik | 5.888945 | 0.000793 | 0.044001 |
| Gm3669        | 5.715371 | 0.000528 | 0.035231 |
| Gm2101        | 5.698038 | 0.000532 | 0.035231 |
| Gm2165        | 5.698038 | 0.000532 | 0.035231 |
| C1s2          | 5.690084 | 0.000655 | 0.039241 |
| Slc17a3       | 5.564693 | 0.000412 | 0.031017 |
| Dclk1         | 5.462918 | 9.99E-05 | 0.012904 |
| Six3          | 5.460529 | 0.000978 | 0.049439 |
| Dnah5         | 5.450272 | 9.99E-05 | 0.012904 |
| Vmn2r79       | 5.417947 | 0.000141 | 0.016243 |
| Gm13415       | 5.33742  | 0.0009   | 0.0474   |
| Olf1183       | 5.292117 | 0.000367 | 0.029036 |
| Csmd1         | 5.284556 | 6.26E-05 | 0.009611 |
| Asb15         | 5.109857 | 0.000155 | 0.017365 |
| Gm3348        | 5.088981 | 0.000904 | 0.0474   |
| Gm3170        | 5.088981 | 0.000904 | 0.0474   |

|               |          |          |          |
|---------------|----------|----------|----------|
| Pappa2        | 4.946791 | 0.000773 | 0.043387 |
| A2m           | 4.924142 | 0.000982 | 0.049576 |
| 4931429L15Rik | 4.896868 | 0.000811 | 0.044603 |
| Gm47409       | 4.896502 | 0.000284 | 0.025384 |
| Vmn1r55       | 4.882049 | 0.000349 | 0.028447 |
| Gm19459       | 4.754927 | 0.000181 | 0.018806 |
| 1700110I01Rik | 4.736556 | 5.04E-05 | 0.008289 |
| C230057M02Rik | 4.731109 | 0.000186 | 0.01924  |
| C5ar1         | 4.652619 | 0.000565 | 0.036106 |
| Ppp2r2c       | 4.615458 | 0.000763 | 0.043095 |
| Scn3a         | 4.607301 | 0.000581 | 0.036718 |
| Cdh10         | 4.599595 | 5.37E-05 | 0.008774 |
| Fam81a        | 4.50421  | 0.000553 | 0.035852 |
| Gm37087       | 4.492128 | 0.000392 | 0.03009  |
| Tcp10c        | 4.453908 | 2.88E-05 | 0.005678 |
| Parva         | 4.440782 | 0.000862 | 0.046386 |
| Myom2         | 4.40196  | 0.00069  | 0.039942 |
| Duxf3         | 4.380135 | 0.000288 | 0.025531 |
| Myh6          | 4.291068 | 7.43E-05 | 0.010616 |
| Gm45159       | 4.204214 | 0.000799 | 0.04428  |
| Ntrk2         | 4.196494 | 0.000866 | 0.046489 |
| Edil3         | 4.144189 | 0.000687 | 0.039863 |
| Abcc8         | 3.981785 | 0.000964 | 0.049162 |
| Nanog         | 3.925054 | 0.000791 | 0.044001 |
| Rpl19-ps3     | 3.902462 | 0.000844 | 0.045875 |
| Adamts1       | 3.822247 | 0.000451 | 0.032625 |
| Nlrp12        | 3.794535 | 0.000212 | 0.020829 |
| Gm37985       | 3.701192 | 4.64E-05 | 0.007926 |
| Gm15795       | 3.584363 | 0.000237 | 0.022341 |
| Fst           | 3.541167 | 0.00061  | 0.037342 |
| Gm12642       | 3.540674 | 7.25E-05 | 0.010567 |
| Vwa3a         | 3.521964 | 0.000437 | 0.031943 |
| Gm45660       | 3.51337  | 0.000116 | 0.014083 |
| Gm44792       | 3.288713 | 7.47E-05 | 0.010616 |
| 4930429P21Rik | 3.164075 | 0.000535 | 0.035231 |
| Gm9407        | 3.134437 | 0.000468 | 0.033231 |
| Gm8341        | 2.875537 | 0.000684 | 0.039863 |
| Gm49391       | 2.840022 | 0.000419 | 0.03132  |
| Gm7823        | 2.799998 | 0.000746 | 0.042547 |
| Gm5910        | 2.760416 | 0.000439 | 0.03195  |
| Gm5511        | 2.735553 | 0.000687 | 0.039863 |
| Gm8874        | 2.714718 | 8.93E-05 | 0.011918 |
| Actb-ps1      | 2.660724 | 0.000586 | 0.036736 |
| Gm8652        | 2.632289 | 9.90E-05 | 0.012904 |
| Gm5461        | 2.630657 | 0.000159 | 0.017627 |
| Gm7059        | 2.605758 | 0.000292 | 0.025713 |
| Gm6192        | 2.580159 | 0.000764 | 0.043095 |

|            |          |          |          |
|------------|----------|----------|----------|
| Gm37017    | 2.509731 | 0.00078  | 0.043609 |
| Gm9432     | 2.461501 | 0.00016  | 0.017641 |
| Gm8920     | 2.438561 | 2.28E-05 | 0.004817 |
| Gm6758     | 2.375312 | 0.000858 | 0.04627  |
| Gm6681     | 2.368504 | 0.000883 | 0.046874 |
| Gm21960    | 2.31152  | 0.000173 | 0.018208 |
| Gm671      | 2.297118 | 0.000904 | 0.0474   |
| Gm16216    | 2.289973 | 0.000289 | 0.025531 |
| Gm46522    | 2.277413 | 0.000769 | 0.043258 |
| Ahnak2     | 2.262061 | 1.67E-05 | 0.003888 |
| Synb       | 2.250283 | 0.000153 | 0.017225 |
| Pkd1l2     | 2.176603 | 3.33E-05 | 0.006306 |
| Gm27179    | 2.174965 | 0.000624 | 0.037701 |
| Rps12-ps17 | 2.159689 | 0.000508 | 0.034523 |
| Adgrg6     | 2.157248 | 0.000381 | 0.029746 |
| Gm7413     | 2.08507  | 0.000488 | 0.033851 |
| Gm22571    | 2.057904 | 0.00081  | 0.044603 |
| Gm12430    | 1.994902 | 0.00024  | 0.022543 |
| Itgb6      | 1.951379 | 0.000584 | 0.036736 |
| Gm26532    | 1.948967 | 0.000792 | 0.044001 |
| Gm7232     | 1.889665 | 0.000889 | 0.047147 |
| Gm5529     | 1.852062 | 0.000416 | 0.031198 |
| Gm5913     | 1.829664 | 0.000676 | 0.039863 |
| Synpo      | 1.82954  | 5.85E-06 | 0.00189  |
| Gm35853    | 1.812366 | 1.51E-14 | 8.55E-11 |
| Gm37352    | 1.75583  | 0.000441 | 0.031985 |
| Pi16       | 1.694409 | 1.37E-05 | 0.003425 |
| Gm49739    | 1.65843  | 0.000685 | 0.039863 |
| Gm8922     | 1.65702  | 0.000973 | 0.049382 |
| Sag        | 1.619341 | 0.000109 | 0.013661 |
| St8sia6    | 1.577034 | 4.56E-10 | 7.62E-07 |
| Igkv1-110  | 1.454589 | 0.000351 | 0.028447 |
| Slc4a8     | 1.431963 | 1.99E-06 | 0.000775 |
| Gm4247     | 1.414173 | 5.27E-06 | 0.001721 |
| Amd-ps4    | 1.400147 | 0.000496 | 0.033954 |
| Gm40645    | 1.399946 | 2.23E-06 | 0.000846 |
| Pdcd1lg2   | 1.39353  | 1.02E-08 | 9.31E-06 |
| Hsf2bp     | 1.390347 | 1.39E-05 | 0.003425 |
| Mgam       | 1.385155 | 0.000496 | 0.033954 |
| Gm43145    | 1.344091 | 0.000753 | 0.04279  |
| Krt80      | 1.274184 | 3.44E-10 | 6.11E-07 |
| Tlr12      | 1.269389 | 5.78E-05 | 0.009231 |
| Ryr1       | 1.180893 | 1.68E-06 | 0.000696 |
| Gm47547    | 1.159535 | 0.000678 | 0.039863 |
| Car12      | 1.129994 | 0.000284 | 0.025384 |
| Rab44      | 1.125375 | 9.80E-07 | 0.000488 |
| Rab11fip4  | 1.120982 | 0.000685 | 0.039863 |



|               |          |          |          |
|---------------|----------|----------|----------|
| Itga2b        | 1.105217 | 2.24E-09 | 2.89E-06 |
| Bpifc         | 1.092356 | 8.62E-05 | 0.011829 |
| Fgf3          | 1.063914 | 0.000305 | 0.026318 |
| 9530018F02Rik | 1.048702 | 1.74E-08 | 1.54E-05 |
| Ahnak         | 1.047899 | 1.51E-06 | 0.000669 |
| Cp            | 1.024253 | 0.000166 | 0.017706 |
| Sbsn          | 1.012909 | 1.22E-05 | 0.003201 |
| Gm45203       | 1.012082 | 6.03E-07 | 0.000323 |
| Lag3          | 0.99895  | 6.12E-05 | 0.009481 |
| B230362B09Rik | 0.991767 | 5.05E-05 | 0.008289 |
| Snord43       | 0.971408 | 0.000352 | 0.028447 |
| Ttn           | 0.970557 | 7.43E-06 | 0.002247 |
| Map3k6        | 0.965797 | 1.74E-06 | 0.000706 |
| Gm16464       | 0.961741 | 0.000558 | 0.035943 |
| Gm37747       | 0.958882 | 0.00096  | 0.049051 |
| Arfgef3       | 0.948043 | 3.77E-06 | 0.001323 |
| Zbtb16        | 0.946326 | 1.02E-05 | 0.002781 |
| Itgam         | 0.941599 | 3.22E-06 | 0.001143 |
| I730030J21Rik | 0.920229 | 4.97E-06 | 0.001662 |
| B4galnt4      | 0.907007 | 2.79E-05 | 0.00562  |
| Rps10         | 0.90281  | 0.000939 | 0.048519 |
| Robo3         | 0.90162  | 0.000311 | 0.026763 |
| Thy1          | 0.896984 | 2.86E-05 | 0.005678 |
| Emilin2       | 0.873467 | 9.41E-07 | 0.000477 |
| Epop          | 0.871962 | 0.000108 | 0.013661 |
| Efr3b         | 0.862247 | 6.97E-06 | 0.002152 |
| Gm37069       | 0.861381 | 0.000976 | 0.049439 |
| Gm43420       | 0.86079  | 0.000166 | 0.017706 |
| Mmp2          | 0.830217 | 0.000583 | 0.036718 |
| Dcun1d4       | 0.82765  | 6.37E-06 | 0.00201  |
| Snora43       | 0.825452 | 5.55E-05 | 0.009019 |
| Ffar2         | 0.819802 | 1.01E-06 | 0.000494 |
| C030034L19Rik | 0.817393 | 1.68E-07 | 0.000116 |
| Epb41l4a      | 0.817175 | 0.000391 | 0.03009  |
| Gm28530       | 0.815777 | 4.40E-05 | 0.007622 |
| Mast1         | 0.796958 | 0.000282 | 0.025362 |
| Stx3          | 0.791415 | 5.61E-07 | 0.000307 |
| Gm45718       | 0.768664 | 3.03E-05 | 0.005931 |
| Rrs1          | 0.757398 | 0.000498 | 0.033954 |
| Soat2         | 0.755157 | 0.000487 | 0.033851 |
| Gm15657       | 0.744337 | 0.000301 | 0.026185 |
| Ung           | 0.741701 | 2.26E-05 | 0.004817 |
| Slc18a2       | 0.739392 | 0.000126 | 0.014933 |
| Snhg15        | 0.734861 | 8.23E-06 | 0.002386 |
| Gm32742       | 0.708734 | 0.000515 | 0.034898 |
| P2ry2         | 0.698658 | 0.000734 | 0.04204  |
| Fkbp5         | 0.686387 | 7.35E-05 | 0.010616 |

|               |          |          |          |
|---------------|----------|----------|----------|
| Nlrc4         | 0.677026 | 0.000921 | 0.047812 |
| Aatf          | 0.675274 | 0.000168 | 0.017841 |
| Znhit6        | 0.647403 | 6.50E-05 | 0.009808 |
| Ctps          | 0.647058 | 0.000387 | 0.030058 |
| Fabp5         | 0.6444   | 0.000481 | 0.033658 |
| Lilr4b        | 0.644067 | 0.00032  | 0.027483 |
| Timm10        | 0.641554 | 0.000386 | 0.030058 |
| Dancr         | 0.632353 | 0.000245 | 0.022913 |
| Mdn1          | 0.628068 | 4.68E-05 | 0.007926 |
| Rrp15         | 0.625446 | 0.000684 | 0.039863 |
| Cd244a        | 0.624188 | 1.82E-05 | 0.004098 |
| 5430416N02Rik | 0.622615 | 8.91E-06 | 0.002531 |
| Pus7          | 0.618376 | 8.87E-05 | 0.011918 |
| Gpatch4       | 0.616256 | 0.000565 | 0.036106 |
| D030028A08Rik | 0.616163 | 0.000988 | 0.049694 |
| Pwp2          | 0.615213 | 4.23E-05 | 0.007428 |
| Baz1a         | 0.614372 | 0.000476 | 0.033546 |
| Rec8          | 0.609234 | 3.33E-05 | 0.006306 |
| Mboat1        | 0.606005 | 0.000705 | 0.040698 |
| Ftsj3         | 0.60432  | 0.000432 | 0.031796 |
| Pik3cb        | 0.60306  | 0.000532 | 0.035231 |
| Sntb2         | 0.60163  | 0.000425 | 0.031524 |
| Lat2          | 0.583476 | 3.27E-05 | 0.006273 |
| Trmo          | 0.574866 | 0.000294 | 0.025804 |
| Pinx1         | 0.571942 | 0.000623 | 0.037701 |
| Mettl1        | 0.564658 | 0.000424 | 0.031524 |
| Firre         | 0.563546 | 8.30E-07 | 0.000429 |
| Pdgfrb        | 0.56185  | 0.0002   | 0.019996 |
| Trf           | 0.553612 | 0.000392 | 0.03009  |
| Prodh         | 0.550239 | 1.47E-05 | 0.00354  |
| Nol10         | 0.545558 | 0.000842 | 0.045875 |
| Akap1         | 0.543177 | 9.97E-05 | 0.012904 |
| Chn2          | 0.542024 | 9.33E-05 | 0.012337 |
| Svil          | 0.532524 | 1.04E-05 | 0.002781 |
| Mrto4         | 0.515741 | 0.000855 | 0.046184 |
| Pprc1         | 0.506313 | 1.47E-05 | 0.00354  |
| Tsr1          | 0.506174 | 3.70E-07 | 0.000234 |

y vehicle controls.

Supplemental Figure 1

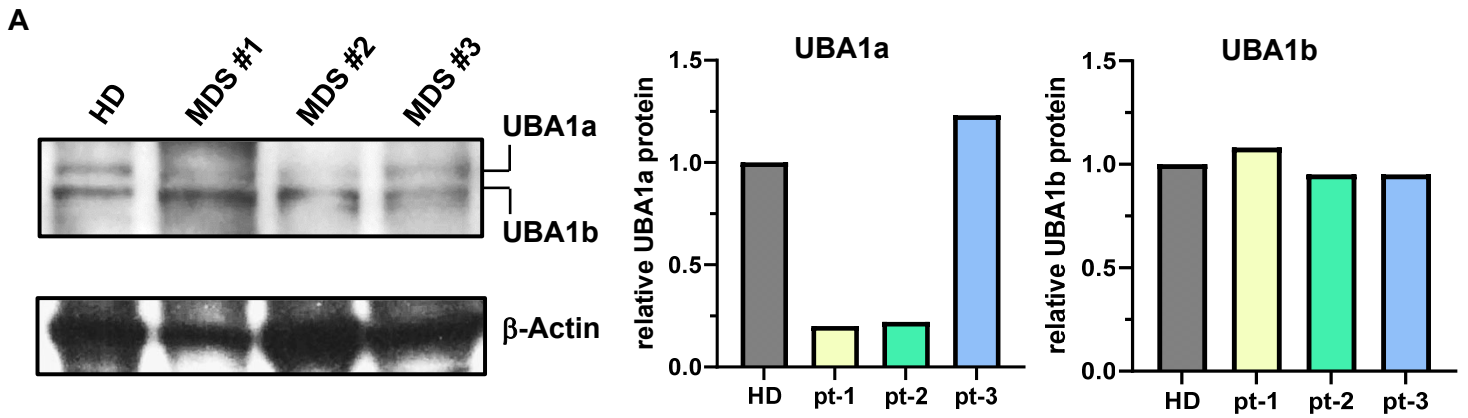

**B**

| MDS-EB             | Complex CG | WBC ( $10^9/L$ ) | ANC ( $10^9/L$ ) |
|--------------------|------------|------------------|------------------|
| UBA1 low (n=11)    | 55%        | 2.2              | 0.69             |
| UBA1 normal (n=18) | 22%        | 3.5              | 1.5              |
| P-value            | 0.05       | 0.02             | 0.003            |

**C**

| MDS-LB             | Hemoglobin (g/dL) | Platelets ( $10^9/L$ ) |
|--------------------|-------------------|------------------------|
| UBA1 low (n=11)    | 9.2               | 187                    |
| UBA1 normal (n=11) | 10.8              | 105                    |
| P-value            | 0.048             | 0.02                   |

**D**

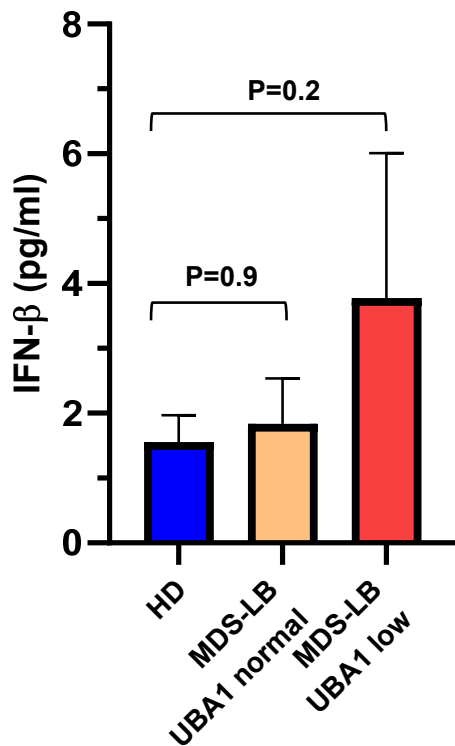

## Supplemental Figure 2

A

| <b><i>SF3B1</i> mutation-specific alternative splicing events</b> |             |
|-------------------------------------------------------------------|-------------|
| A3SS_JCEC                                                         | 293         |
| A5SS_JCEC                                                         | 285         |
| MXE_JCEC                                                          | 45          |
| RI_JCEC                                                           | 29          |
| SE_JCEC                                                           | 408         |
| <b>Total</b>                                                      | <b>1060</b> |

B

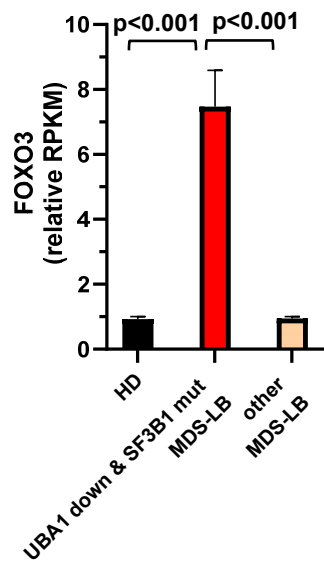

C

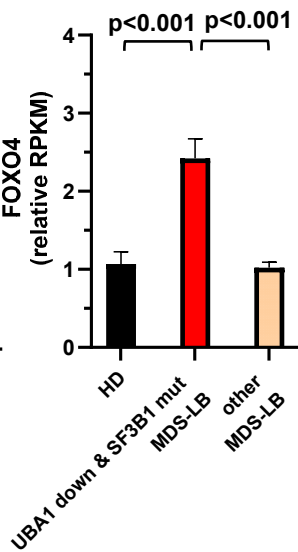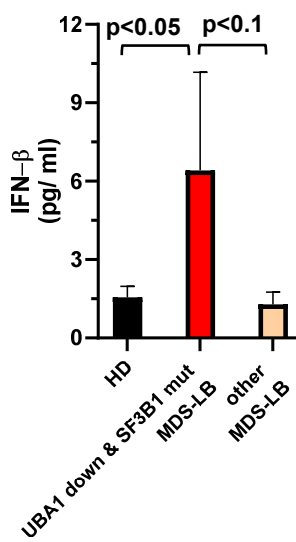

Supplemental Figure 3

A

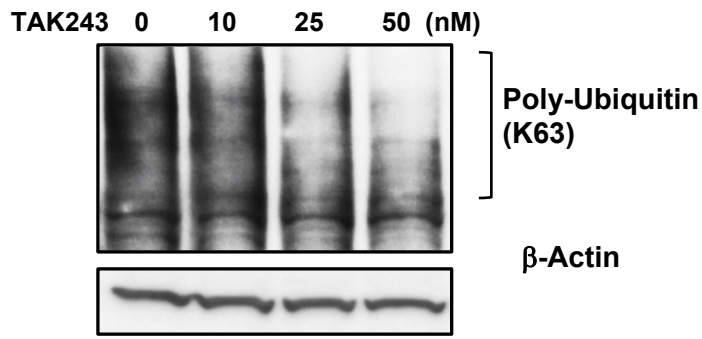

B

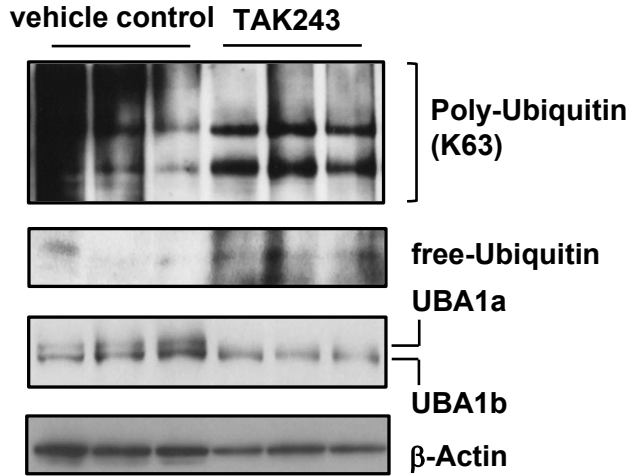

C

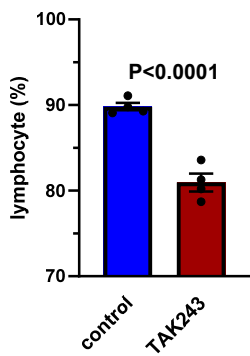

D

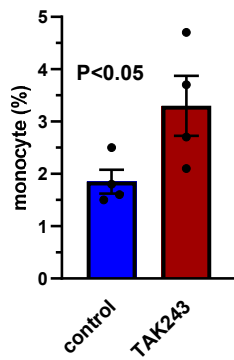

E

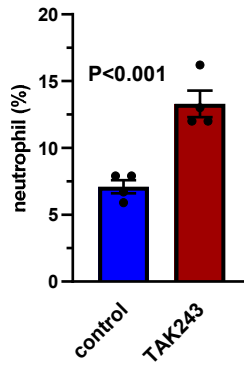

F

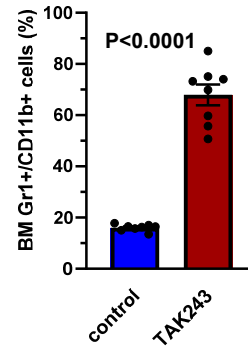

G

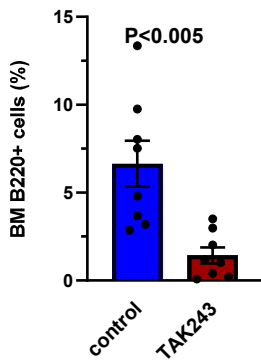

H

| Gene                                          | C1s2   | C6     |
|-----------------------------------------------|--------|--------|
| Base mean                                     | 10.77  | 7.71   |
| Log <sub>2</sub> fold change (TAK243 vs ctrl) | 5.69   | 6.69   |
| P                                             | 0.0007 | 0.0009 |
| Adjusted P                                    | 0.039  | 0.048  |

I

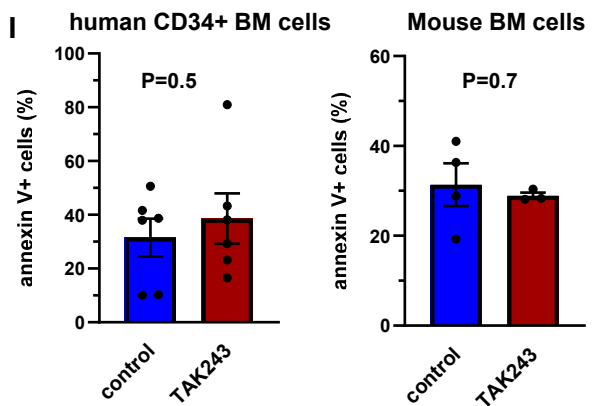

Supplement: 41375_2024_2364_MOESM1_ESM.pdf [file 41375_2024_2364_MOESM1_ESM.pdf]
